# Supplementary material for: The chemoselective and efficient deprotection of silyl ethers using trimethylsilyl bromide
Source: Royal Society of Chemistry journal article supplement (doi:10.1039/b803949f), 2008-01-01

## **Supporting Information**

### **The Chemoselective and Efficient Deprotection of Silyl Ethers using Trimethylsilyl Bromide**

**Syed Tasadaque A. Shah, Patrick J. Guiry\***

*Centre for Synthesis and Chemical Biology, School of Chemistry and Chemical Biology, UCD Conway Institute, University College Dublin, Belfield, Dublin 4, Ireland*

**NMR Spectra:****(5*S*,6*R*)-5,6-dihydroxy-oct-7-enoic acid methyl ester** (Table 2, entry 7, ref. 2).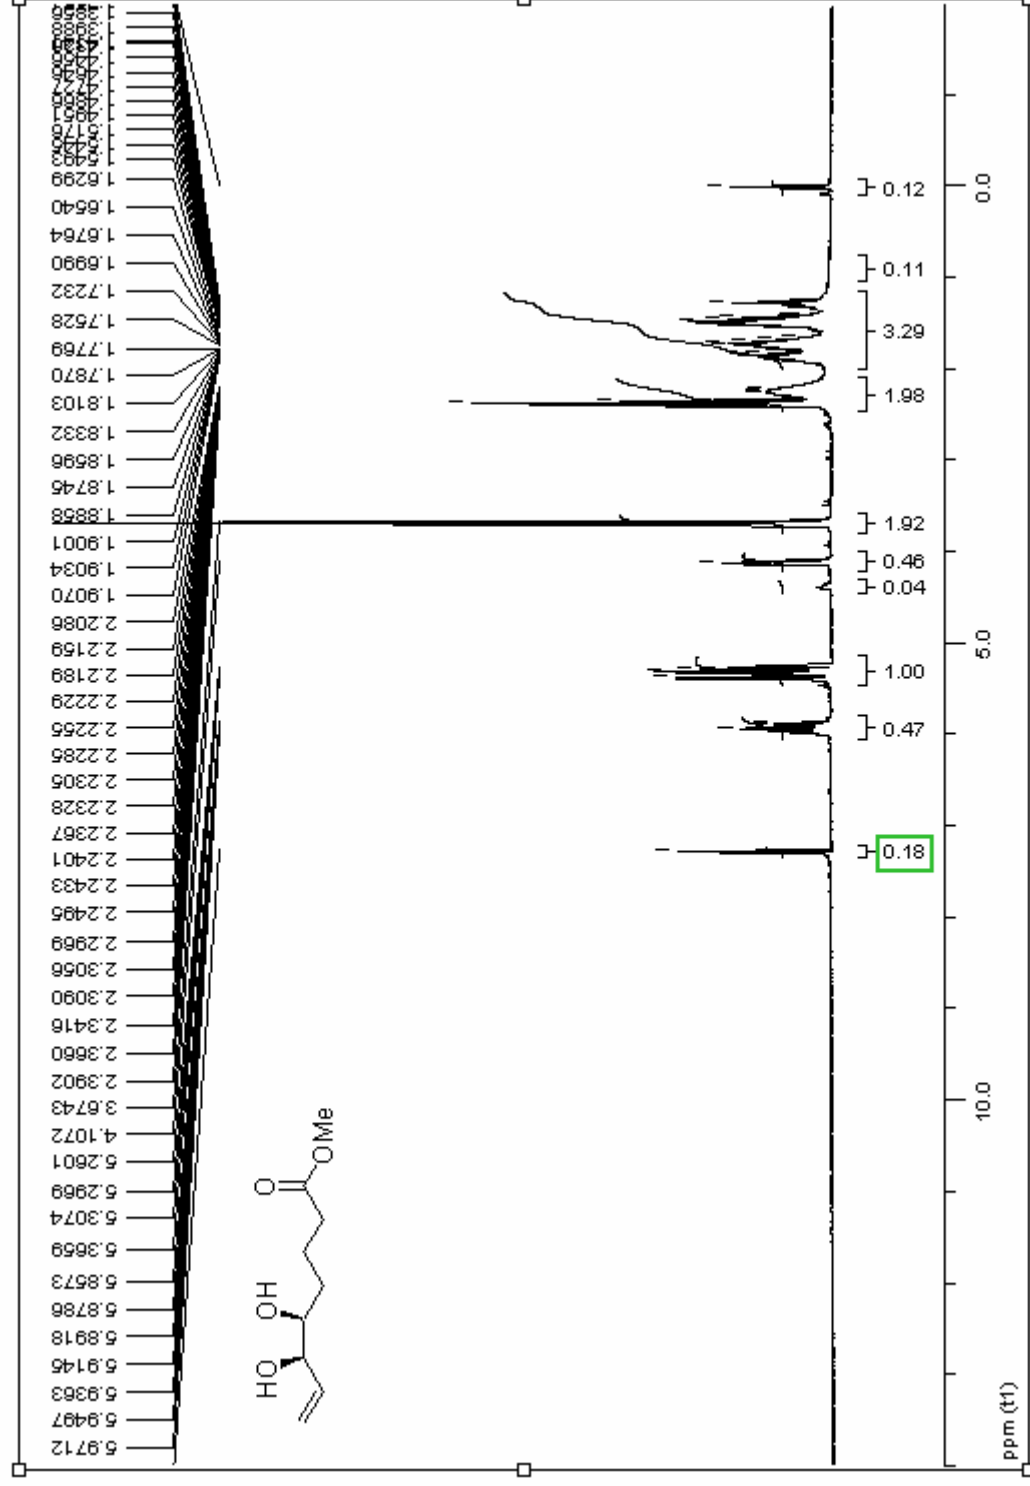

**(5*S*,6*R*)-5,6-dihydroxy-oct-7-enoic acid methyl ester** (Table 2, entry 7, ref. 2).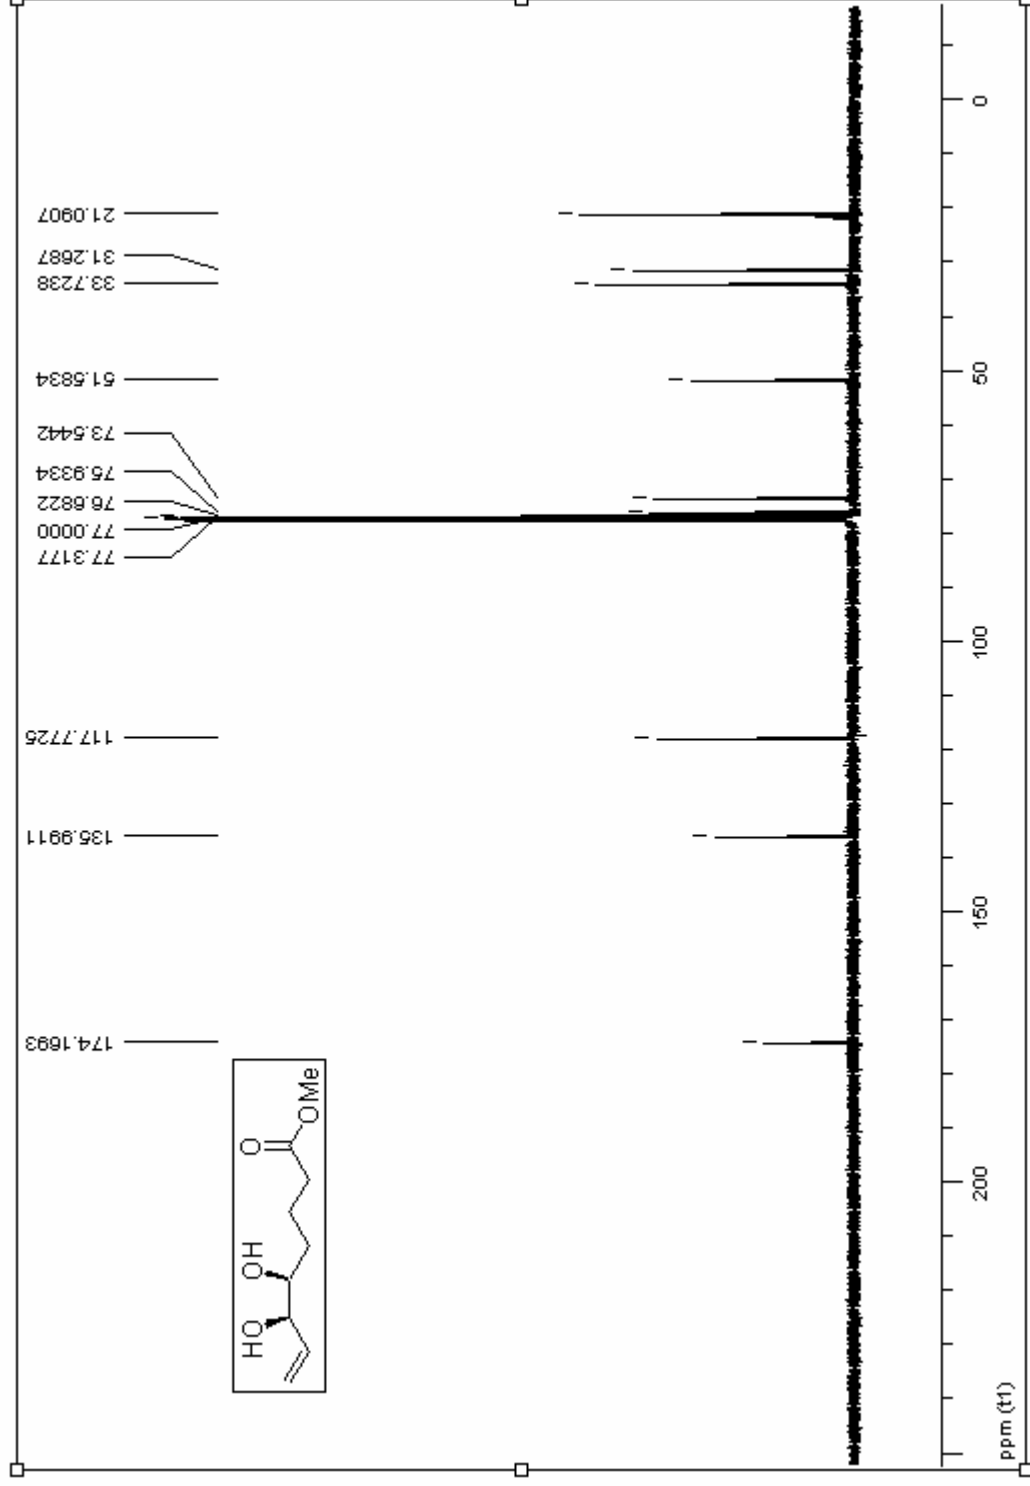

**2-[4'-(tri-isopropylsilyloxy)phenyl]ethanol** (Table 3, entry 1b).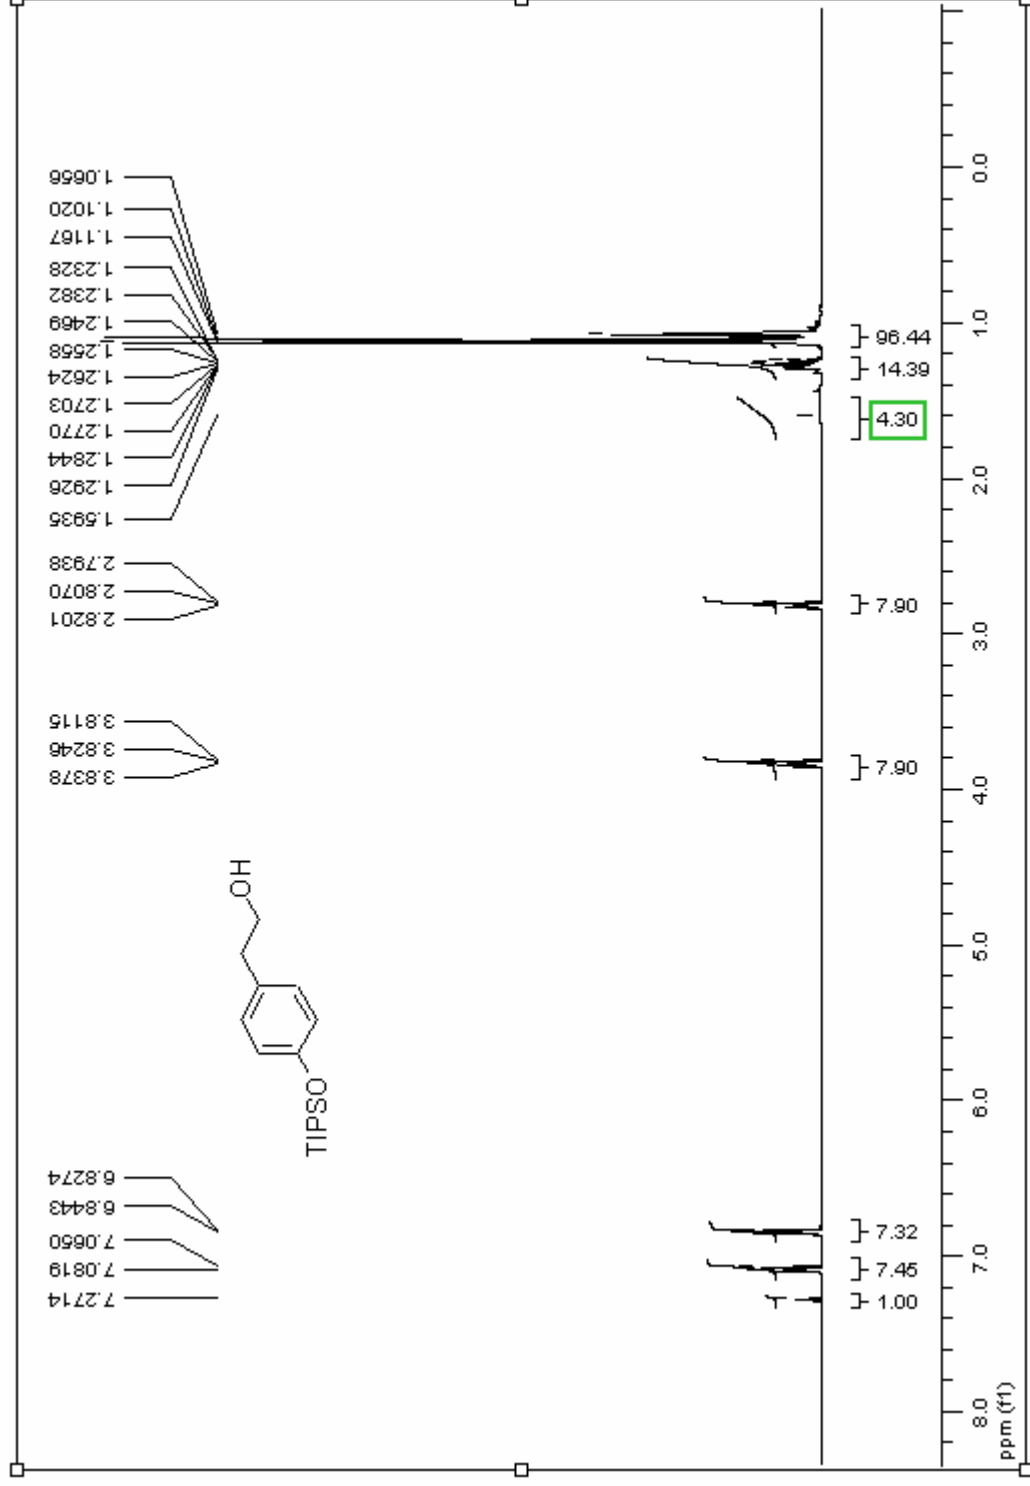

**2-[4'-(tri-isopropylsilyloxy)phenyl]ethanol** (Table 3, entry 1b).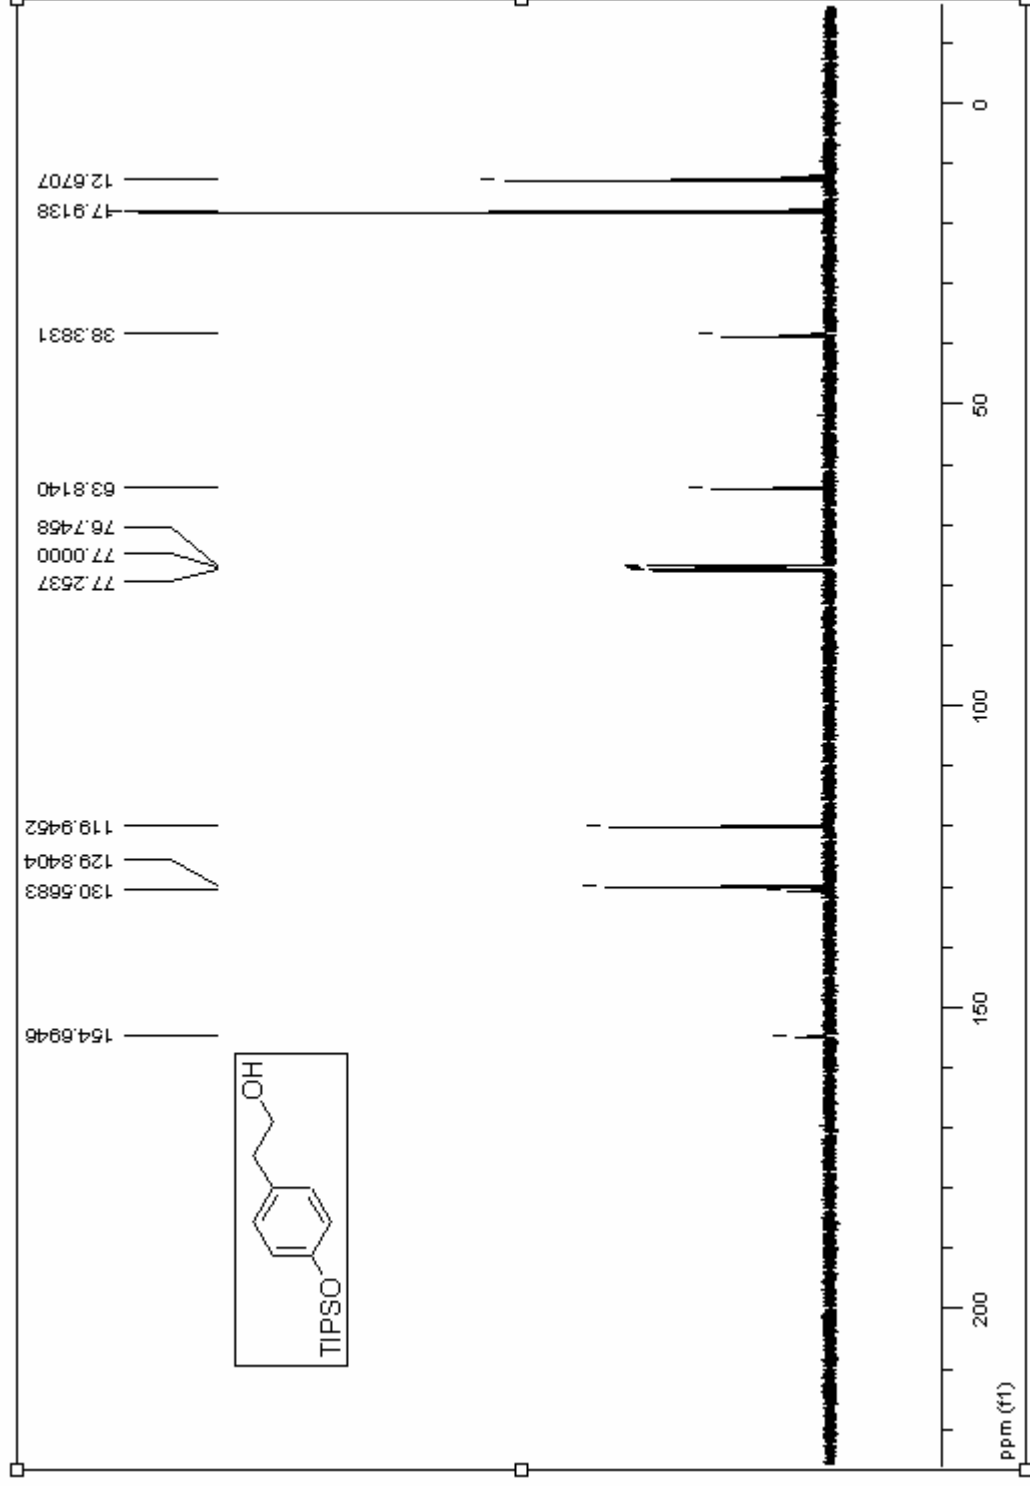

## 2-[4'-(tert-butylphenylsilyloxy)phenyl]ethanol (Table 3, entry 1c).

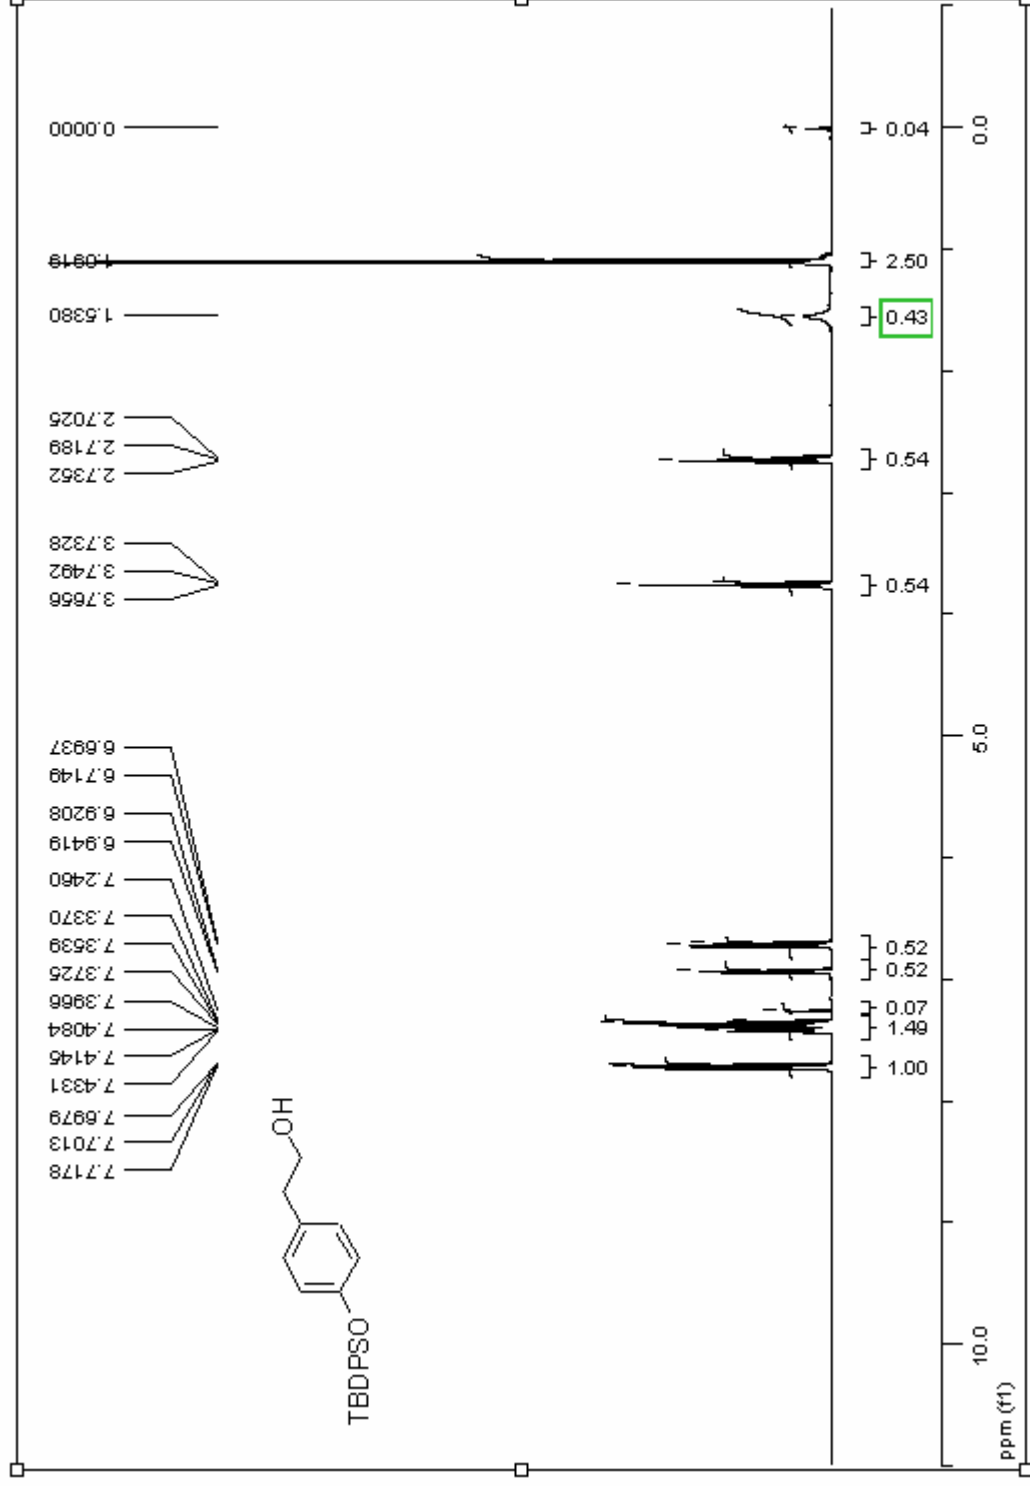

**2-[4'-(tert-butylphenylsilyloxy)phenyl]ethanol (Table 3, entry 1c).**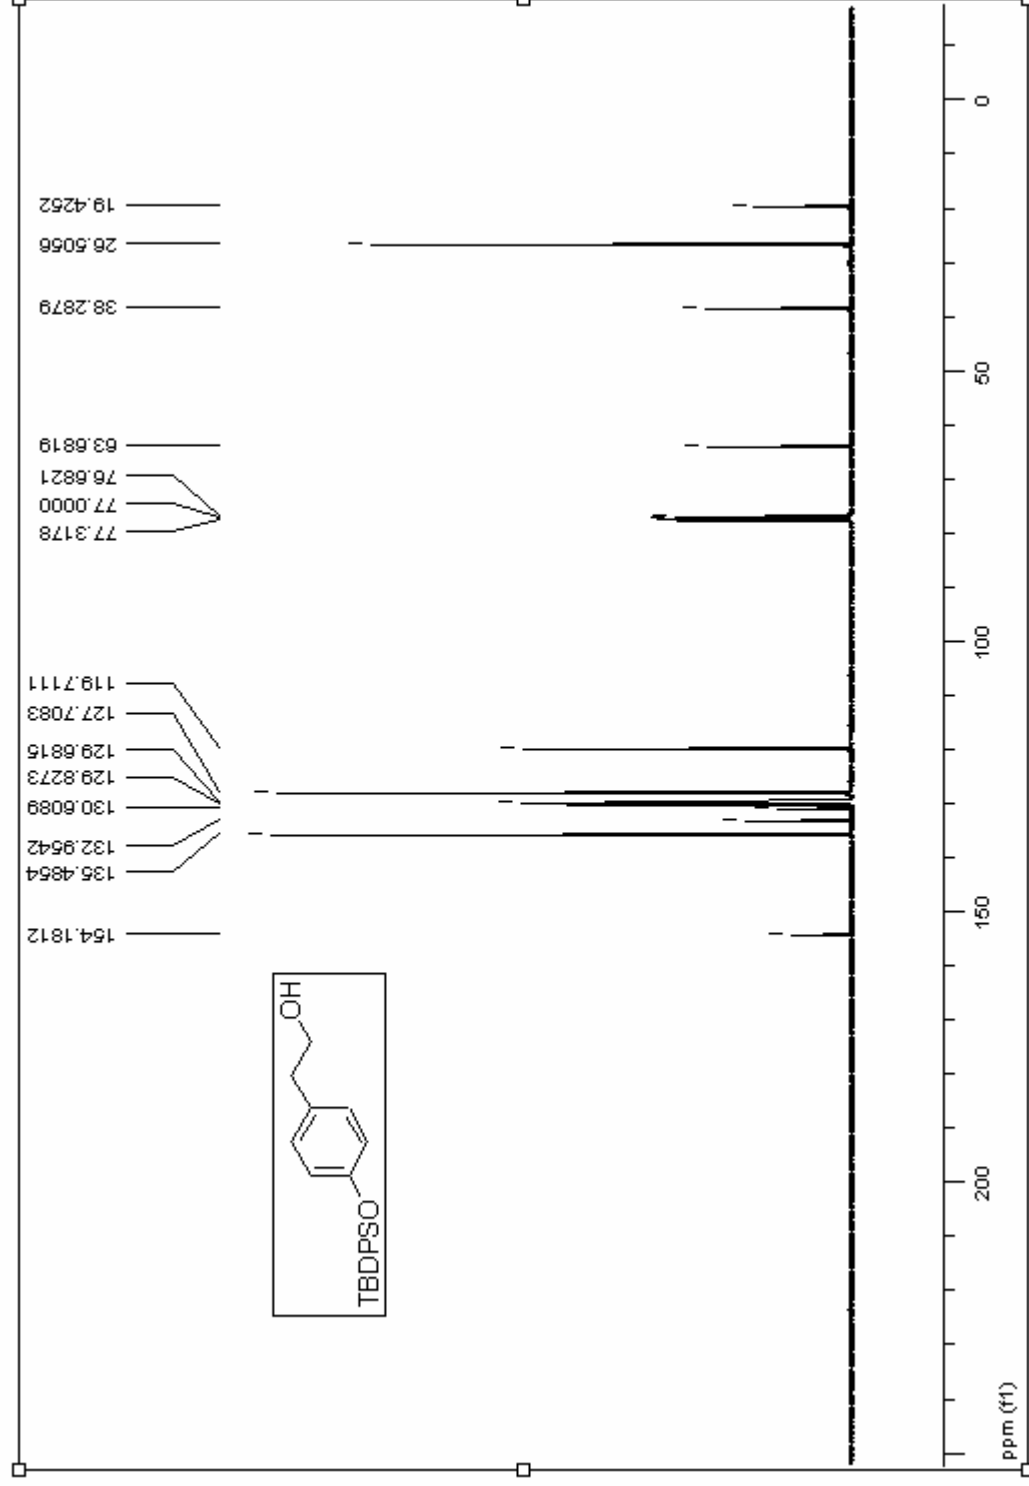

**2-[3'-methoxy-4'-(tert-butylidimethylsilyloxy)phenyl]ethanol (Table 3, entry 2a).**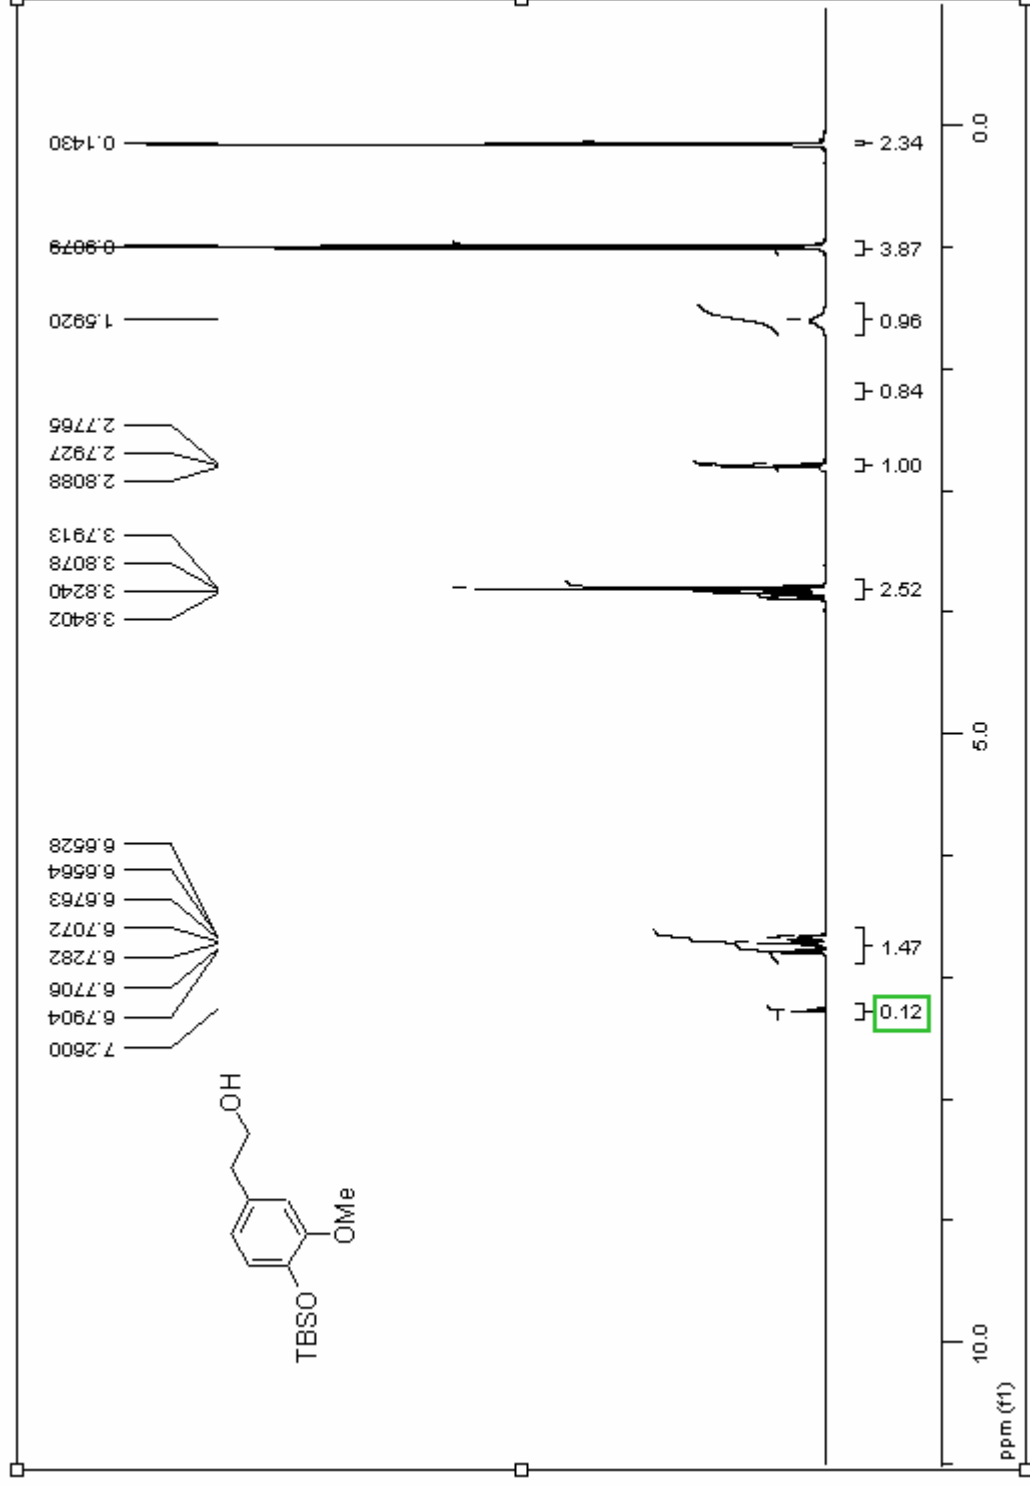



**2-[3'-methoxy-4'-(tert-butylidimethylsilyloxy)phenyl]ethanol (Table 3, entry 2a).**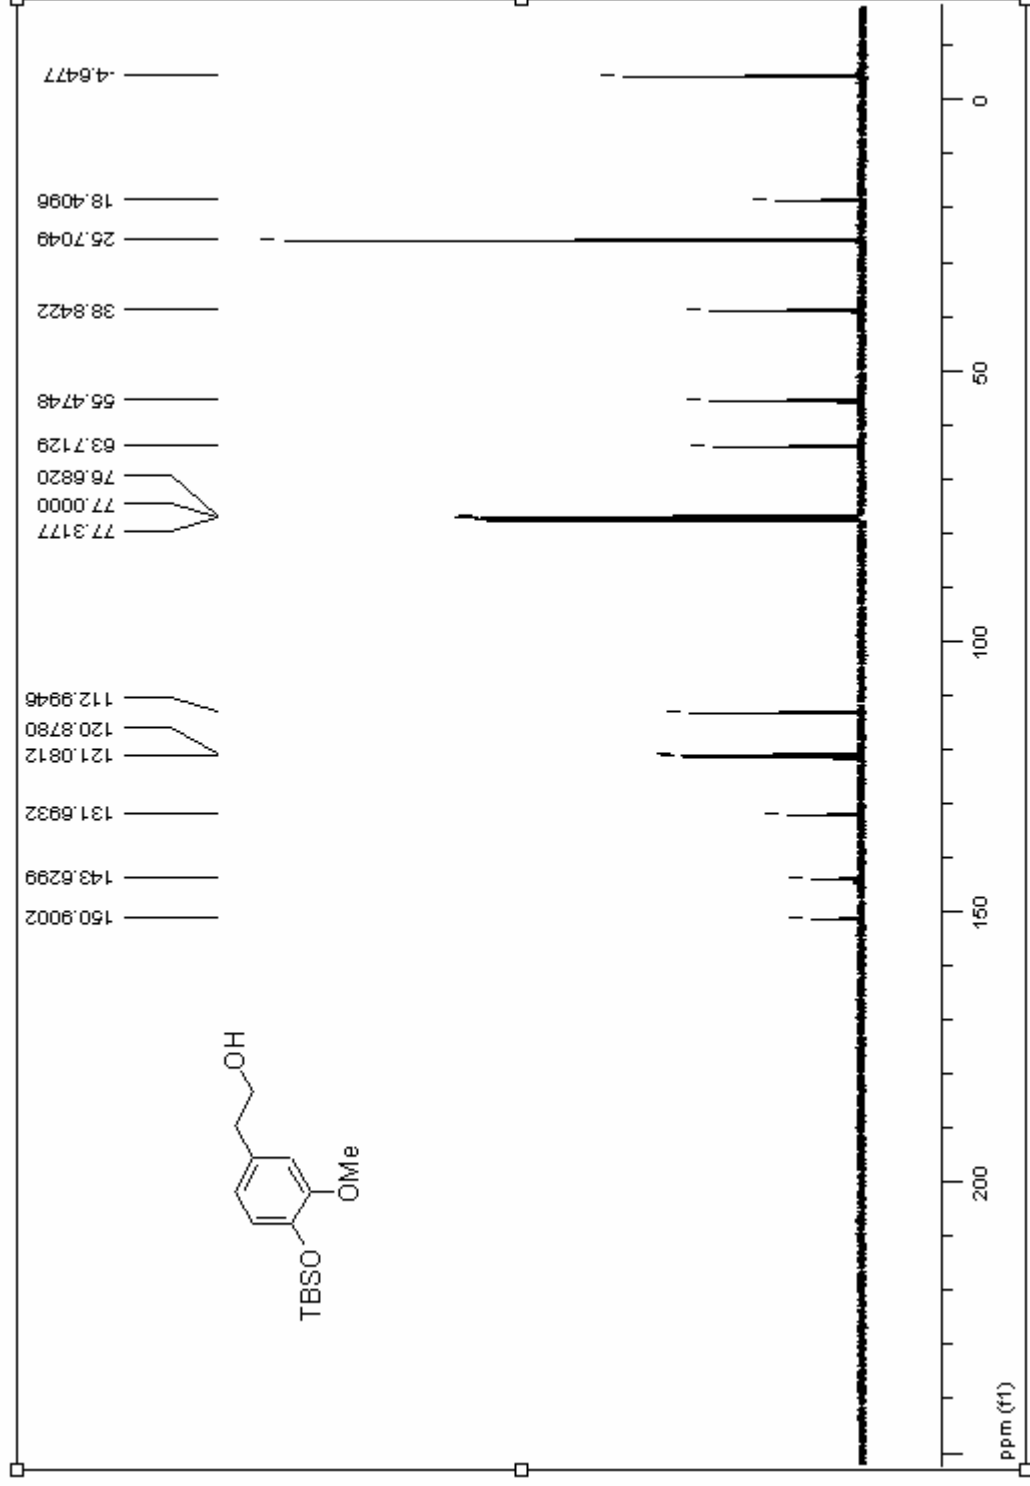

**2-[3'-methoxy-4'-(tri-isopropylsilyloxy)phenyl]ethanol (Table 3, entry 2b).**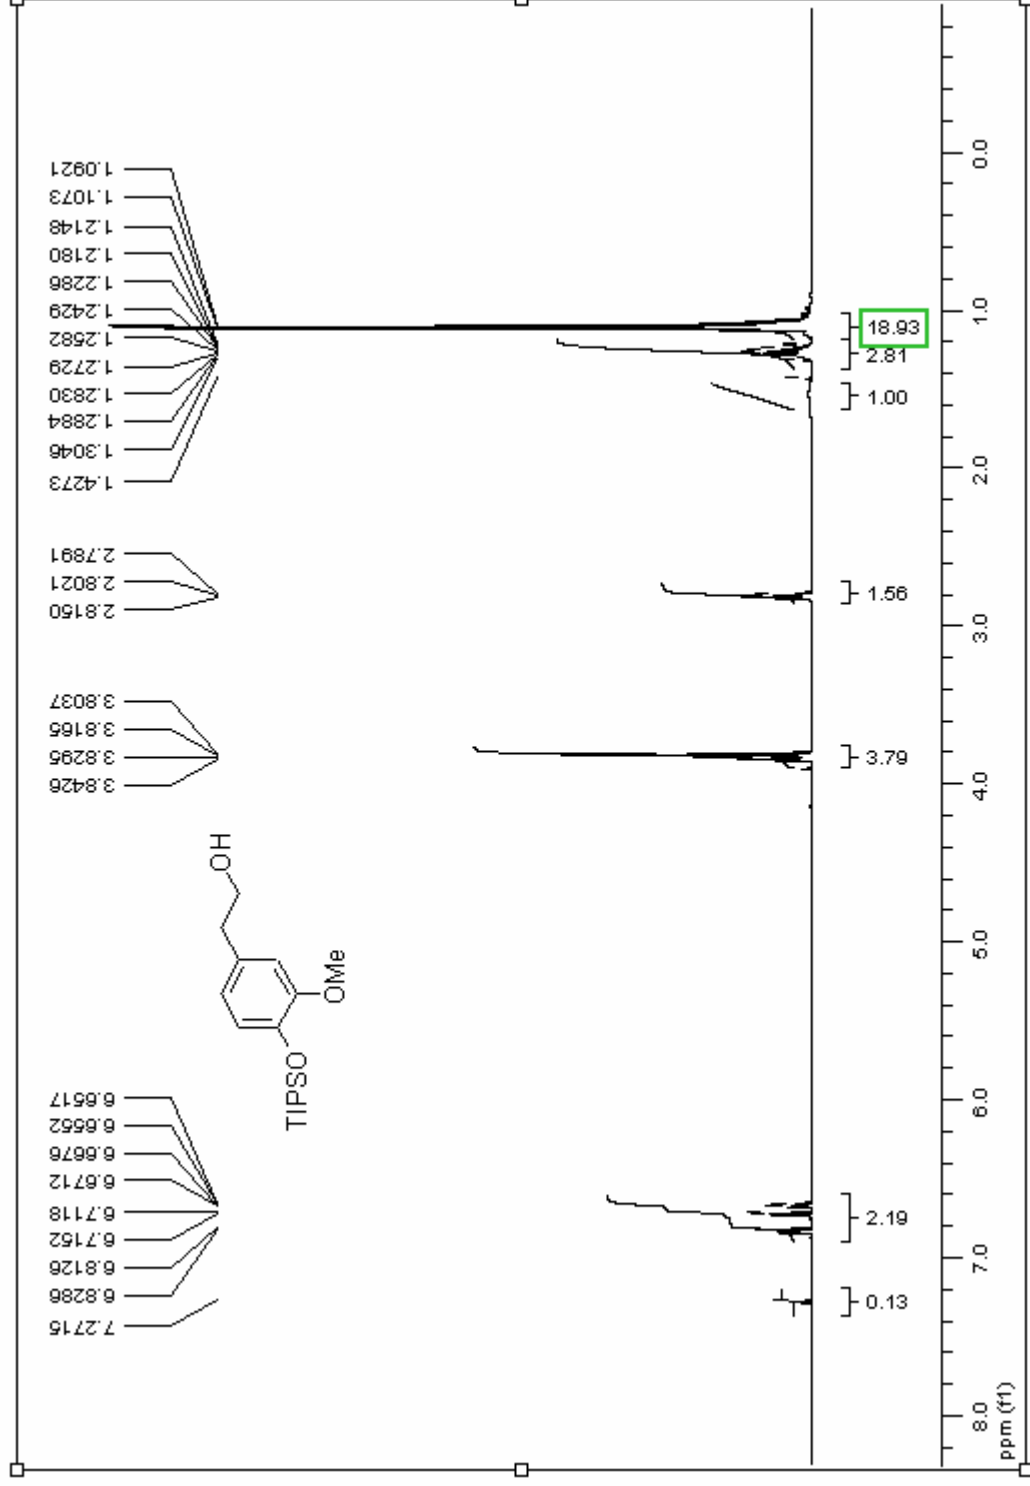

**2-[3'-methoxy-4'-(tri-isopropylsilyloxy)phenyl]ethanol (Table 3, entry 2b).**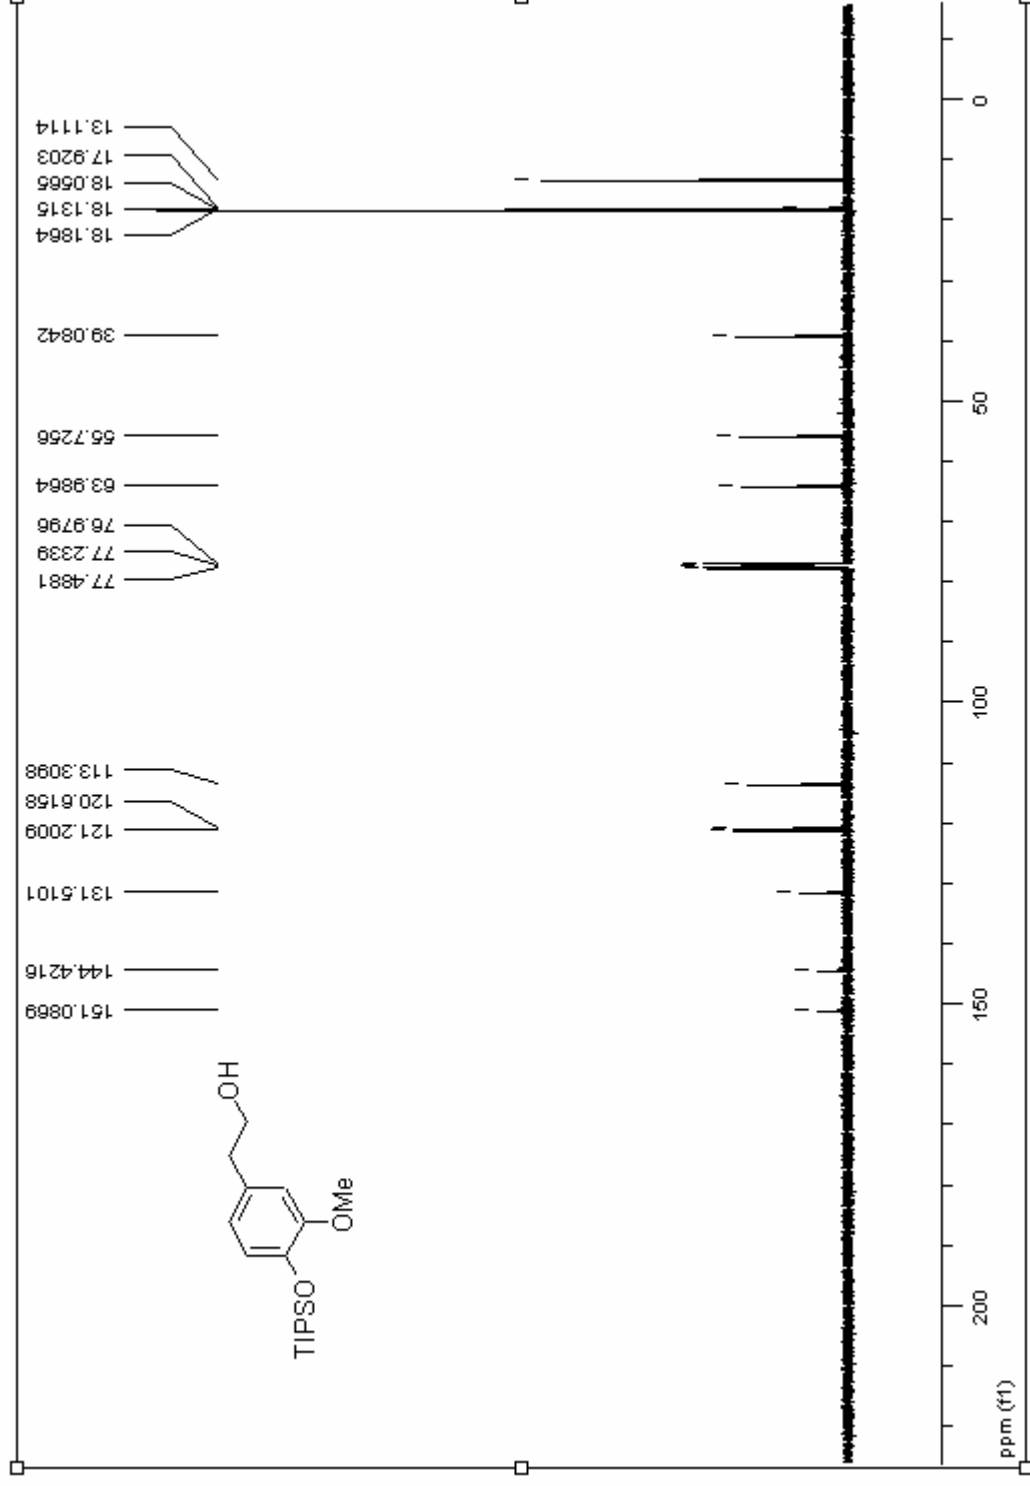

**2-[3'-methoxy-4'-(tert-butyl-diphenylsilyloxy)phenyl]ethanol (Table 3, entry 2c).**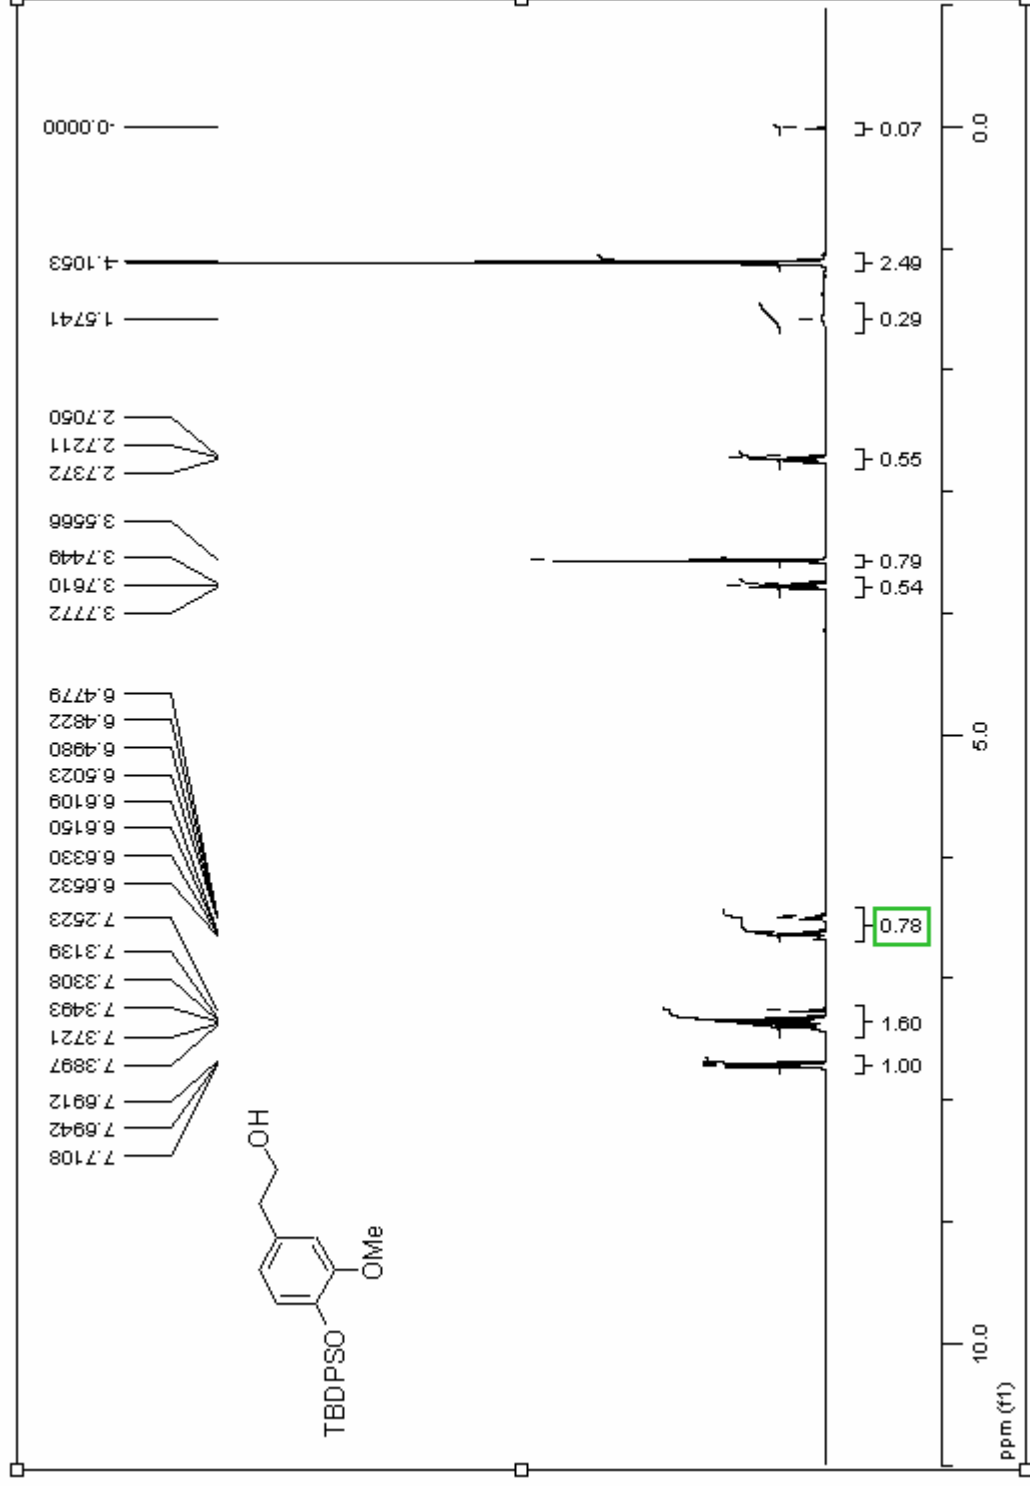

**2-[3'-methoxy-4'-(tert-butyldiphenylsilyloxy)phenyl]ethanol (Table 3, entry 2c).**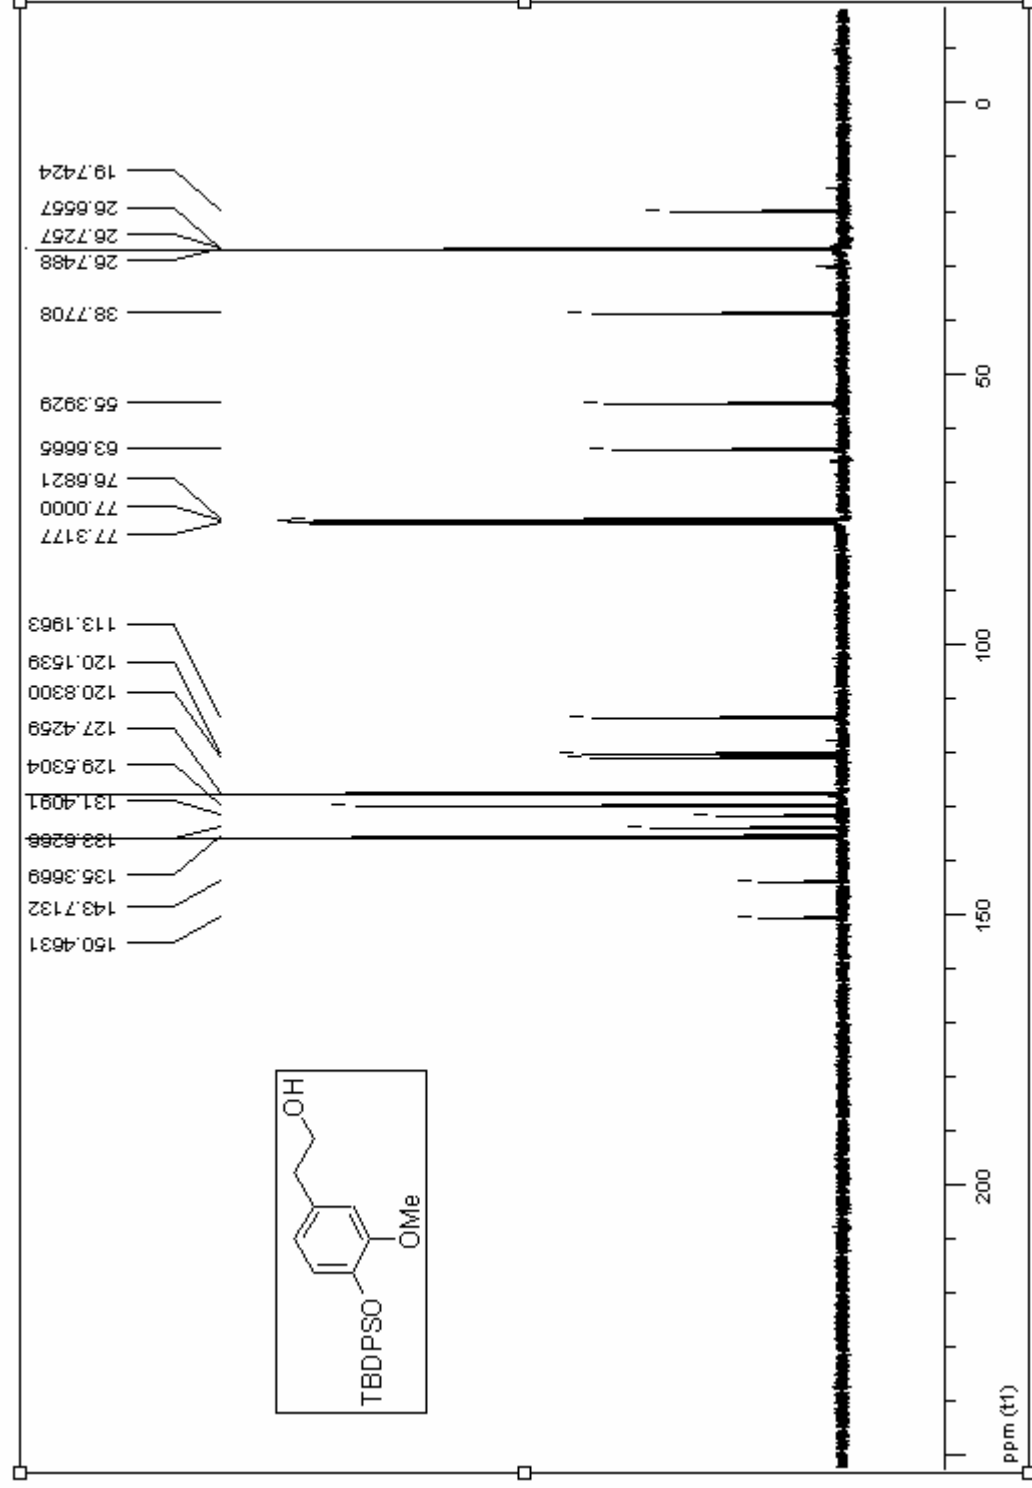

**2-[3'-bromo-4'-(tert-butylidimethylsilyloxy)phenyl]ethanol** (Table 3, entry 3).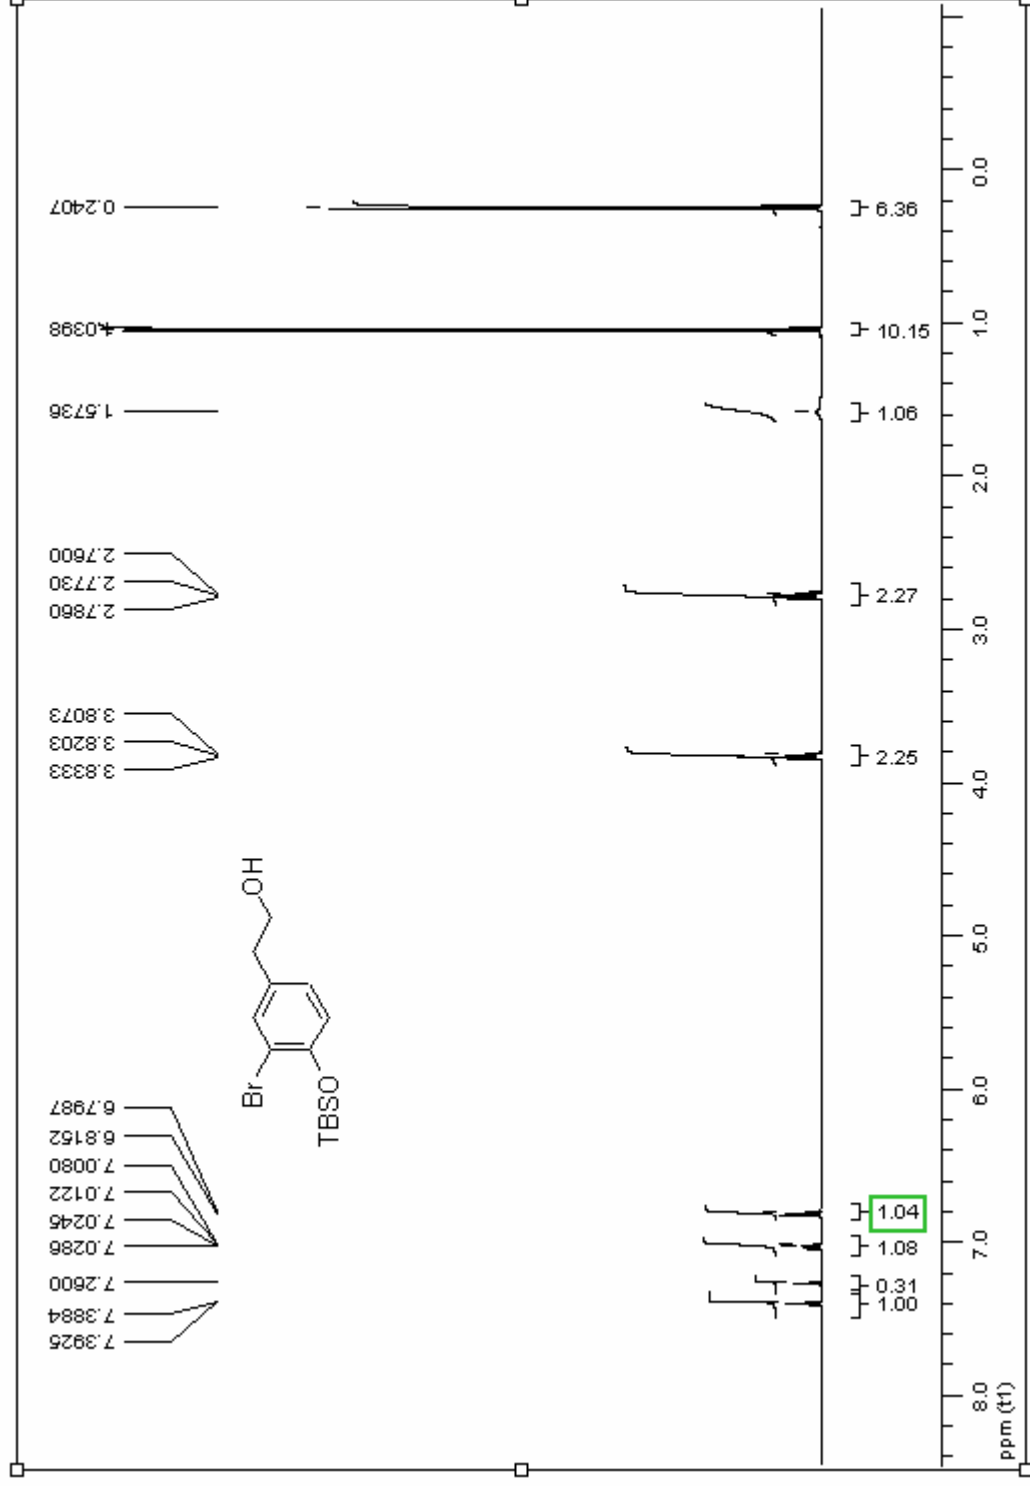

**2-[3'-bromo-4'-(tert-butylidimethylsilyloxy)phenyl]ethanol** (Table 3, entry 3).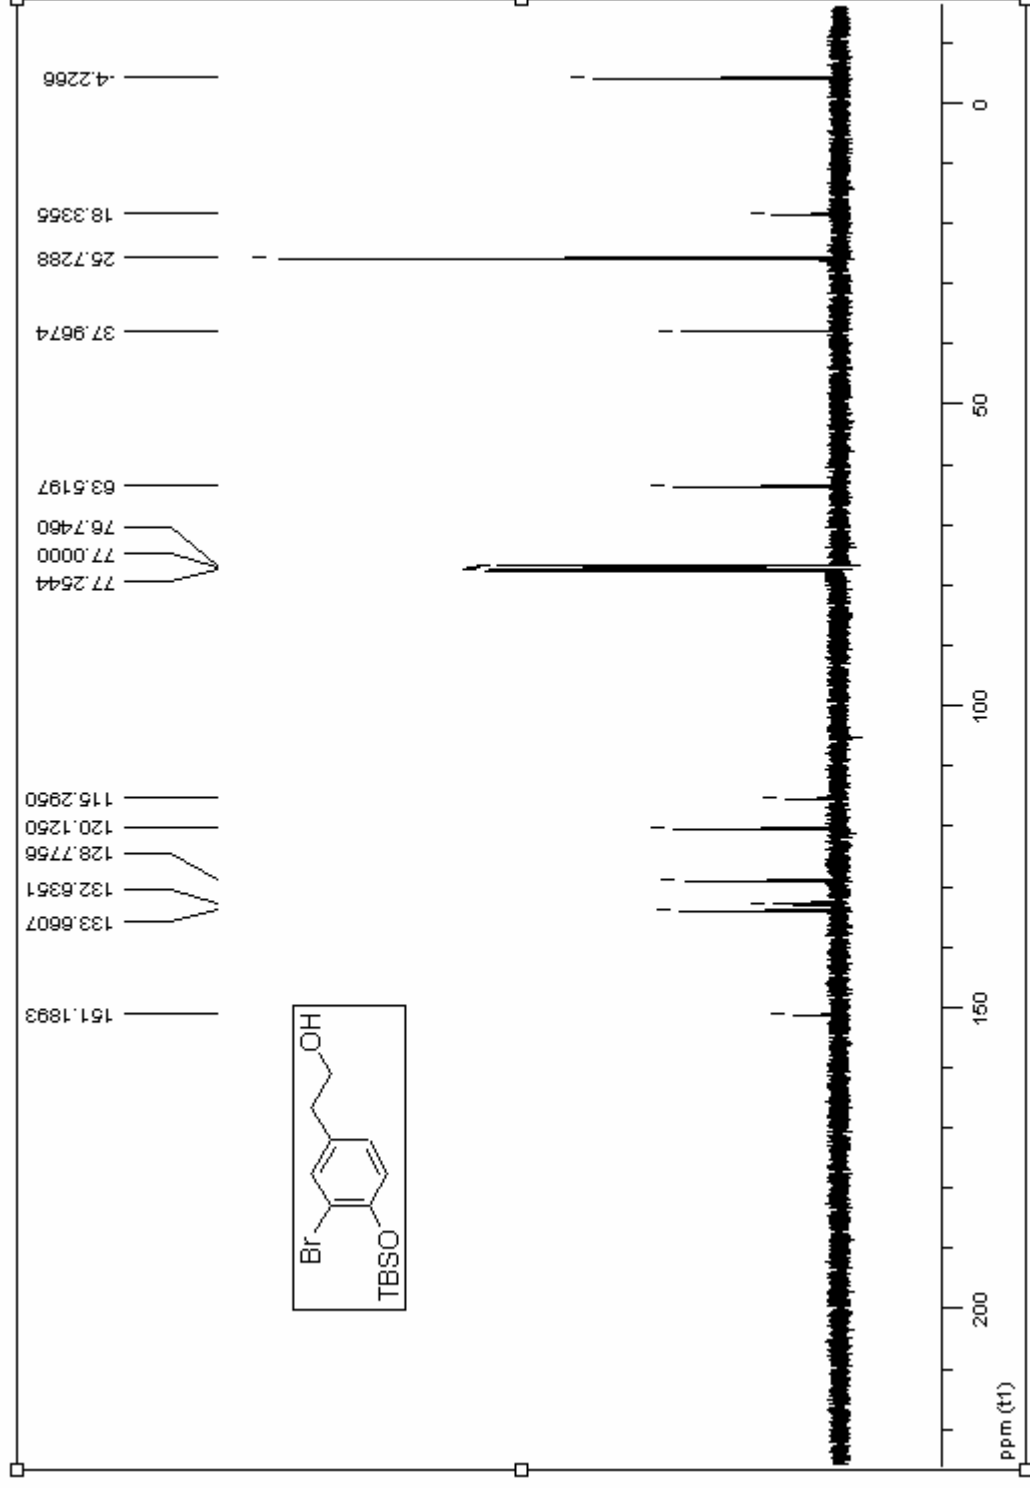

**4-(tert-butylidiphenylsilyloxy)benzyl alcohol** (Table 3, entry 4).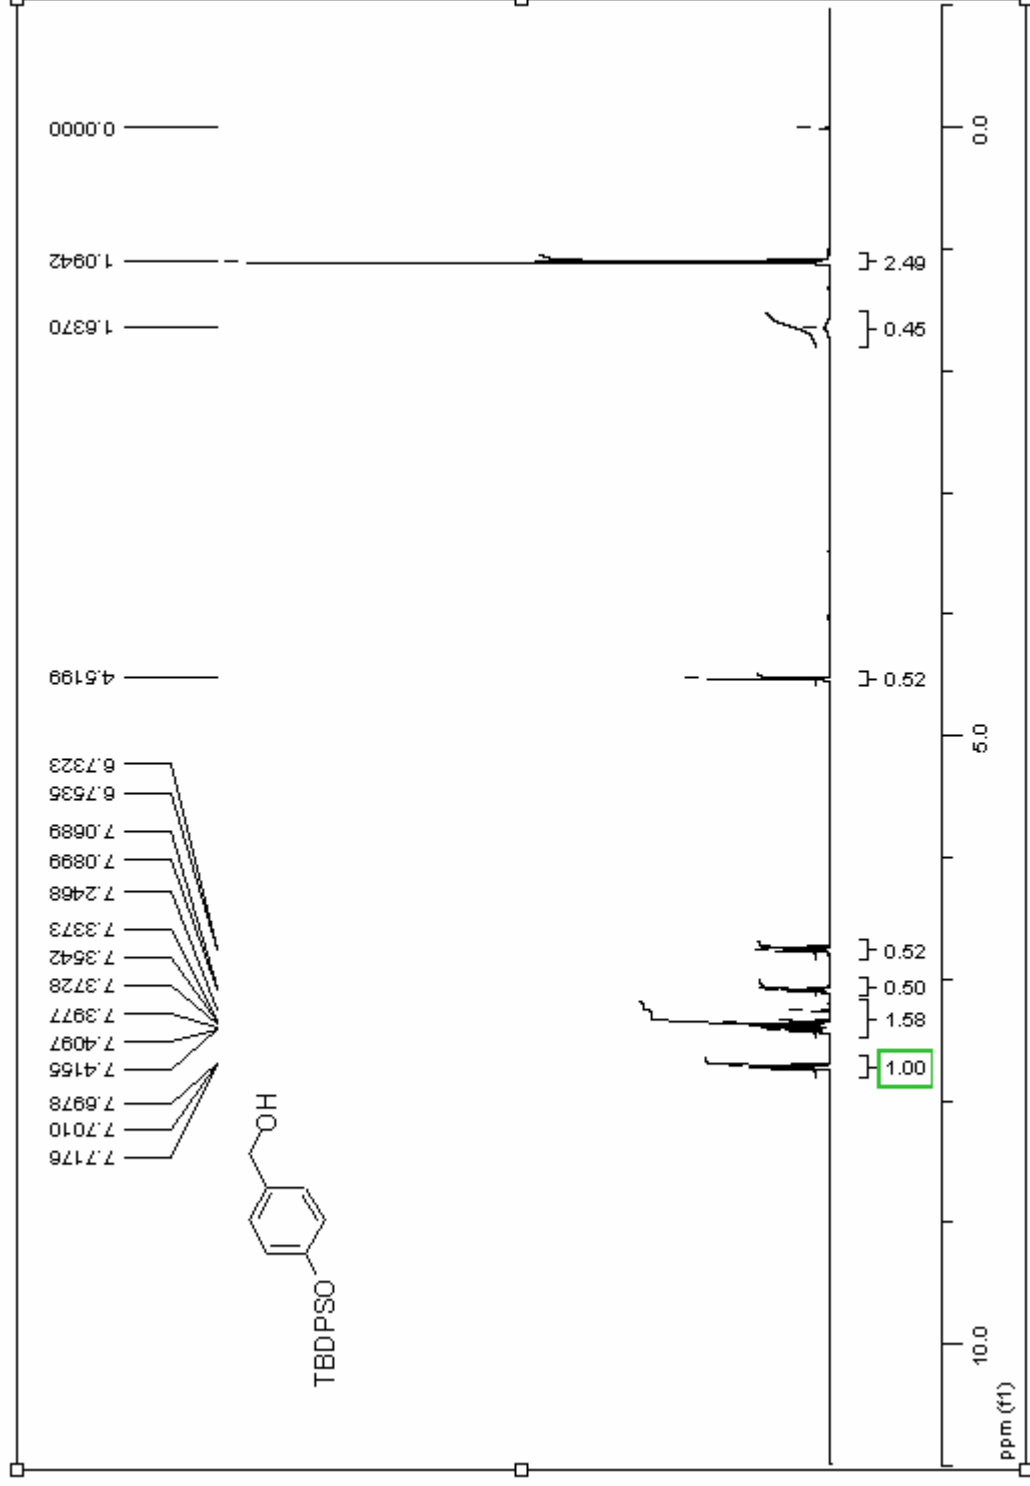



**4-(tert-butyl-diphenylsilyloxy)benzyl alcohol** (Table 3, entry 4).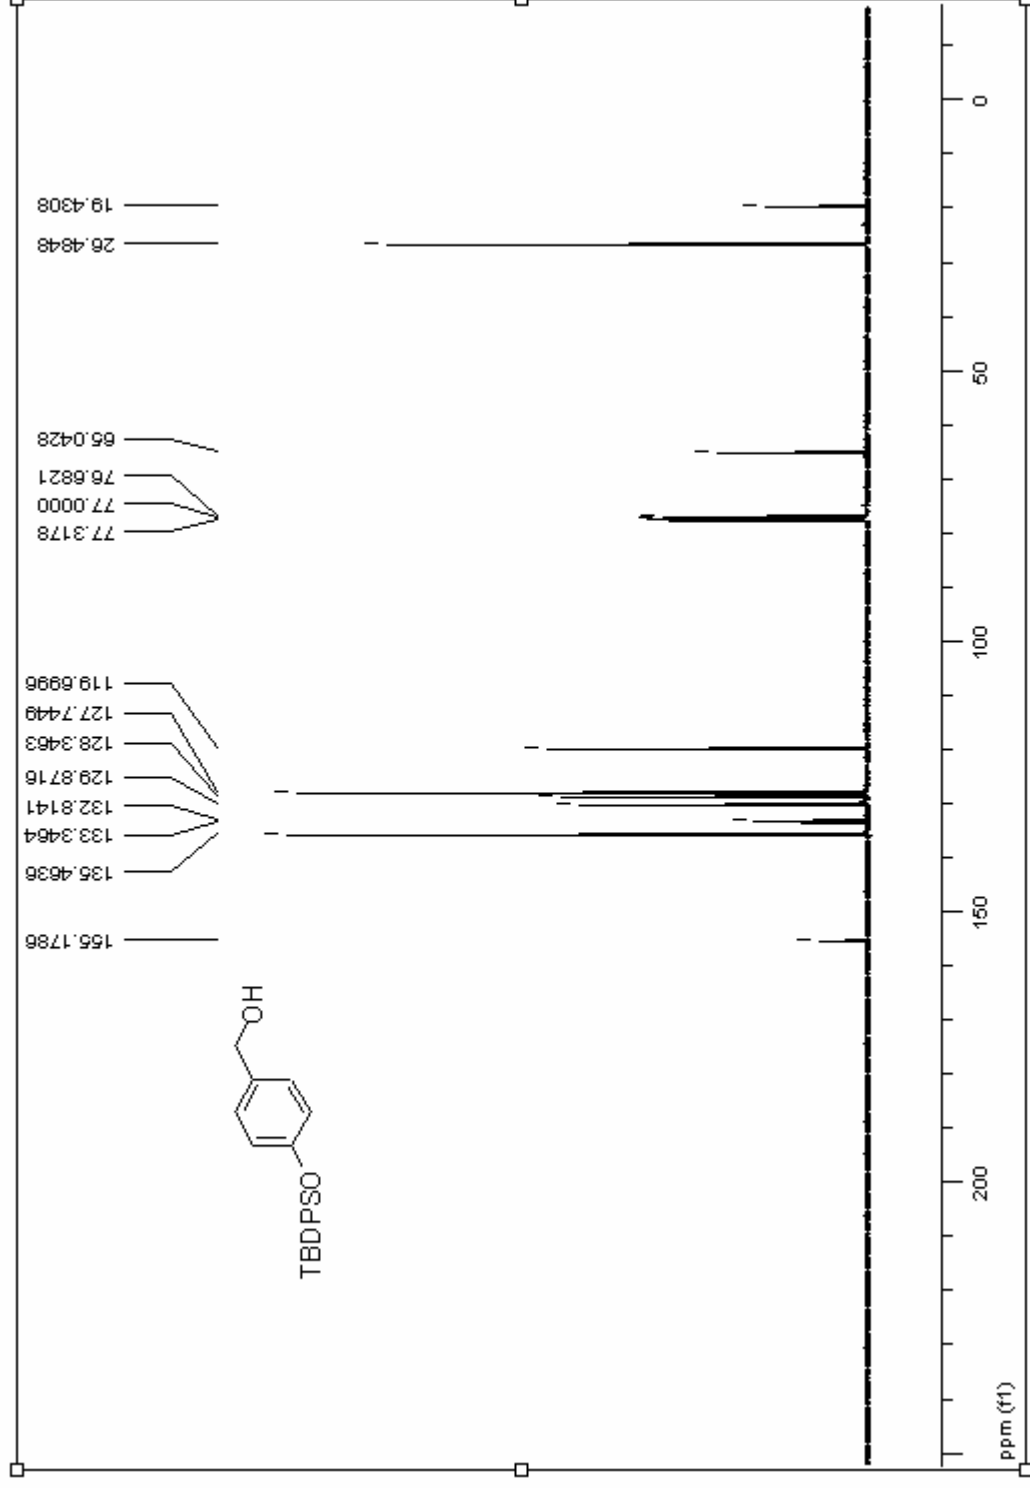

Supplement: b803949f.pdf [file b803949f.pdf]
